# Supplementary material for: Genome-wide analysis of R2R3-MYB transcription factors in Boehmeria nivea (L.) gaudich revealed potential cadmium tolerance and anthocyanin biosynthesis genes
Source: Front Genet. 2023 Feb 21;14:1080909. doi: 10.3389/fgene.2023.1080909 (PMC9989182; doi:10.3389/fgene.2023.1080909)
Supplement: Supplementary file 5 [file Table6.XLSX]

## Sheet: sheet
Table S6: The distribution of the four types of response cis-acting elements for each BnGMYBs promoters
Gene.34335	100	126	Stress responsive
Gene.34335	274	300	Light responsive
Gene.34335	47	73	Phytohormone responsive
Gene.34335	455	481	Plant growth
Gene.34335	109	136	Light responsive
Maker00000585	243	272	Light responsive
Maker00000585	935	963	Light responsive
Maker00000585	822	848	Stress responsive
Maker00000585	902	928	Stress responsive
Maker00000585	507	536	Phytohormone responsive
Maker00000585	230	256	Light responsive
Maker00000585	234	260	Light responsive
Maker00000585	57	84	Light responsive
Maker00000585	58	84	Light responsive
Maker00000585	525	554	Phytohormone responsive
Maker00000585	83	109	Light responsive
Maker00000713	859	885	Light responsive
Maker00000713	809	836	Light responsive
Maker00000713	171	198	Light responsive
Maker00000713	528	557	Light responsive
Maker00000713	292	317	Phytohormone responsive
Maker00000713	478	503	Phytohormone responsive
Maker00000713	714	739	Phytohormone responsive
Maker00000713	712	737	Phytohormone responsive
Maker00000713	738	763	Phytohormone responsive
Maker00000713	378	406	Light responsive
Maker00000713	478	504	Light responsive
Maker00000713	392	421	Stress responsive
Maker00000713	712	737	Phytohormone responsive
Maker00000713	738	763	Phytohormone responsive
Maker00000713	673	701	Light responsive
Maker00000713	346	373	Light responsive
Maker00000810	443	471	Light responsive
Maker00000810	253	282	Stress responsive
Maker00000810	441	470	Light responsive
Maker00000810	597	622	Phytohormone responsive
Maker00000810	251	277	Stress responsive
Maker00000810	908	934	Stress responsive
Maker00000810	552	578	Stress responsive
Maker00000810	646	672	Stress responsive
Maker00000810	311	340	Light responsive
Maker00000820	503	533	Light responsive
Maker00000820	83	108	Phytohormone responsive
Maker00000820	575	600	Phytohormone responsive
Maker00000820	780	807	Light responsive
Maker00000820	14	42	Light responsive
Maker00000820	327	353	Light responsive
Maker00000820	908	934	Light responsive
Maker00000820	933	959	Light responsive
Maker00000820	195	224	Phytohormone responsive
Maker00000820	441	470	Phytohormone responsive
Maker00000820	224	250	Phytohormone responsive
Maker00000820	588	614	Phytohormone responsive
Maker00000820	308	334	Stress responsive
Maker00000820	766	792	Stress responsive
Maker00000820	95	121	Light responsive
Maker00000820	133	159	Light responsive
Maker00000907	220	248	Light responsive
Maker00000907	675	702	Phytohormone responsive
Maker00000907	728	754	Plant growth
Maker00000907	351	380	Phytohormone responsive
Maker00000907	484	514	Phytohormone responsive
Maker00000907	965	991	Stress responsive
Maker00000907	860	887	Light responsive
Maker00000907	111	137	Light responsive
Maker00000907	409	435	Light responsive
Maker00000907	836	863	Plant growth
Maker00002294	428	456	Light responsive
Maker00002294	257	286	Phytohormone responsive
Maker00002294	693	722	Light responsive
Maker00002294	369	395	Light responsive
Maker00002294	376	402	Light responsive
Maker00002294	319	348	Stress responsive
Maker00002294	537	563	Light responsive
Maker00003213	614	644	Light responsive
Maker00003213	138	163	Phytohormone responsive
Maker00003213	631	656	Phytohormone responsive
Maker00003213	13	42	Stress responsive
Maker00003213	115	141	Light responsive
Maker00003213	825	851	Light responsive
Maker00003213	77	103	Light responsive
Maker00003213	17	43	Light responsive
Maker00003213	951	978	Phytohormone responsive
Maker00003213	108	134	Stress responsive
Maker00003213	144	170	Stress responsive
Maker00003213	960	986	Stress responsive
Maker00003213	506	532	Stress responsive
Maker00006515	85	113	Light responsive
Maker00006515	224	249	Phytohormone responsive
Maker00006515	778	803	Phytohormone responsive
Maker00006515	16	44	Light responsive
Maker00006515	224	249	Phytohormone responsive
Maker00006515	778	803	Phytohormone responsive
Maker00006515	11	38	Light responsive
Maker00006515	360	389	Stress responsive
Maker00006748	600	626	Light responsive
Maker00006748	602	628	Light responsive
Maker00006748	111	137	Light responsive
Maker00006748	38	66	Stress responsive
Maker00006748	561	588	Light responsive
Maker00006748	583	609	Stress responsive
Maker00006748	751	777	Stress responsive
Maker00006748	787	813	Stress responsive
Maker00006748	833	863	Light responsive
Maker00006748	16	46	Light responsive
Maker00006748	695	721	Phytohormone responsive
Maker00008700	374	403	Phytohormone responsive
Maker00008700	377	402	Phytohormone responsive
Maker00008700	169	198	Stress responsive
Maker00008700	937	965	Light responsive
Maker00008700	292	321	Light responsive
Maker00008700	144	170	Phytohormone responsive
Maker00008700	947	974	Phytohormone responsive
Maker00010005	71	97	Stress responsive
Maker00010005	125	151	Stress responsive
Maker00010005	459	485	Stress responsive
Maker00010005	645	671	Stress responsive
Maker00010005	60	85	Phytohormone responsive
Maker00010005	775	801	Phytohormone responsive
Maker00010005	555	581	Plant growth
Maker00010005	447	476	Plant growth
Maker00010005	309	336	Light responsive
Maker00010005	255	284	Phytohormone responsive
Maker00010005	17	46	Stress responsive
Maker00010005	32	61	Stress responsive
Maker00010005	46	72	Phytohormone responsive
Maker00010005	47	72	Phytohormone responsive
Maker00010005	369	394	Phytohormone responsive
Maker00010005	537	567	Light responsive
Maker00010005	60	85	Phytohormone responsive
Maker00010012	256	282	Light responsive
Maker00010012	484	510	Light responsive
Maker00010012	880	910	Light responsive
Maker00010012	967	995	Light responsive
Maker00010012	164	189	Phytohormone responsive
Maker00010012	117	150	Light responsive
Maker00010012	228	261	Light responsive
Maker00010012	433	460	Phytohormone responsive
Maker00012681	483	509	Light responsive
Maker00012681	749	775	Light responsive
Maker00012681	33	62	Stress responsive
Maker00012681	826	855	Stress responsive
Maker00012681	867	892	Phytohormone responsive
Maker00012681	300	325	Phytohormone responsive
Maker00012681	727	752	Phytohormone responsive
Maker00012681	787	813	Stress responsive
Maker00012681	415	441	Light responsive
Maker00012681	337	363	Plant growth
Maker00012681	300	325	Phytohormone responsive
Maker00012681	727	752	Phytohormone responsive
Maker00012681	872	898	Stress responsive
Maker00013653	733	762	Light responsive
Maker00013653	208	233	Phytohormone responsive
Maker00013653	734	760	Phytohormone responsive
Maker00013653	735	760	Phytohormone responsive
Maker00016119	675	704	Phytohormone responsive
Maker00016119	849	875	Light responsive
Maker00016119	539	564	Phytohormone responsive
Maker00016119	445	470	Phytohormone responsive
Maker00016119	102	128	Plant growth
Maker00016119	855	881	Plant growth
Maker00016119	539	564	Phytohormone responsive
Maker00016119	121	150.5	Plant growth
Maker00017016	519	545	Light responsive
Maker00017016	628	654	Light responsive
Maker00017016	969	995	Stress responsive
Maker00017016	1000	1026	Stress responsive
Maker00017016	140	166	Stress responsive
Maker00017016	438	464	Light responsive
Maker00017016	442	468	Light responsive
Maker00019397	895	922	Phytohormone responsive
Maker00019397	56	81	Phytohormone responsive
Maker00019397	602	628	Stress responsive
Maker00019397	720	747	Plant growth
Maker00019397	56	81	Phytohormone responsive
Maker00019397	529	555	Phytohormone responsive
Maker00019397	530	555	Phytohormone responsive
Maker00019397	589	618	Phytohormone responsive
Maker00019397	15	44	Light responsive
Maker00019397	76	102	Light responsive
Maker00019397	323	349	Light responsive
Maker00019930	925	953.5	Plant growth
Maker00019930	276	302	Stress responsive
Maker00019930	835	861	Stress responsive
Maker00019930	825	853	Light responsive
Maker00019930	52	78	Light responsive
Maker00019930	56	82	Light responsive
Maker00022368	593	622	Phytohormone responsive
Maker00022368	606	632	Stress responsive
Maker00022368	327	353	Light responsive
Maker00022368	720	747	Plant growth
Maker00022368	895	922	Phytohormone responsive
Maker00022368	533	559	Phytohormone responsive
Maker00022368	534	559	Phytohormone responsive
Maker00024528	575	602	Light responsive
Maker00024528	75	100	Phytohormone responsive
Maker00024528	471	496	Phytohormone responsive
Maker00024528	404	431	Plant growth
Maker00024528	75	100	Phytohormone responsive
Maker00024528	471	496	Phytohormone responsive
Maker00024528	730	759	Light responsive
Maker00024528	620	646	Light responsive
Maker00024528	280	307	Light responsive
Maker00024528	521	548	Light responsive
Maker00024528	522	548	Light responsive
Maker00025443	439	464	Phytohormone responsive
Maker00025443	183	209	Phytohormone responsive
Maker00025443	184	209	Phytohormone responsive
Maker00025443	510	537	Light responsive
Maker00025443	511	537	Light responsive
Maker00025443	245	271	Light responsive
Maker00025443	471	497	Light responsive
Maker00025443	759	785	Light responsive
Maker00025443	874	902	Light responsive
Maker00025443	606	634	Light responsive
Maker00025443	547	577	Light responsive
Maker00025443	530	556	Plant growth
Maker00025443	439	464	Phytohormone responsive
Maker00025443	958	984	Stress responsive
Maker00025443	490	516	Stress responsive
Maker00025443	954	980	Stress responsive
Maker00029953	944	972	Light responsive
Maker00029953	894	920	Stress responsive
Maker00029953	770	796	Light responsive
Maker00029953	966	992	Light responsive
Maker00029953	929	955	Stress responsive
Maker00029953	316	342	Stress responsive
Maker00029953	524	550	Stress responsive
Maker00029953	569	595	Stress responsive
Maker00029953	637	663	Stress responsive
Maker00029953	59	88	Phytohormone responsive
Maker00029953	207	236	Phytohormone responsive
Maker00029953	376	405	Phytohormone responsive
Maker00030423	380	406	Stress responsive
Maker00030423	568	593	Phytohormone responsive
Maker00030423	285	312	Phytohormone responsive
Maker00030423	233	259	Light responsive
Maker00030423	459	485	Light responsive
Maker00030423	659	685	Light responsive
Maker00030423	239	266	Light responsive
Maker00030423	240	266	Light responsive
Maker00030423	983	1012	Phytohormone responsive
Maker00030423	561	586	Phytohormone responsive
Maker00030423	159	187	Plant growth
Maker00030423	568	593	Phytohormone responsive
Maker00030423	349	377	Plant growth
Maker00030668	175	201	Stress responsive
Maker00030668	598	624	Plant growth
Maker00030668	744	774	Light responsive
Maker00030668	716	743	Light responsive
Maker00030668	617	645	Light responsive
Maker00030668	151	180	Phytohormone responsive
Maker00030668	397	426	Stress responsive
Maker00030668	475	501	Light responsive
Maker00030668	482	508	Light responsive
Maker00030668	978	1006	Light responsive
Maker00031449	293	319	Light responsive
Maker00031449	517	543	Light responsive
Maker00031449	717	743	Light responsive
Maker00031449	299	326	Light responsive
Maker00031449	300	326	Light responsive
Maker00031449	409	437	Plant growth
Maker00031449	619	644	Phytohormone responsive
Maker00031449	219	247	Plant growth
Maker00031449	626	651	Phytohormone responsive
Maker00031449	440	466	Stress responsive
Maker00031449	626	651	Phytohormone responsive
Maker00031449	345	372	Phytohormone responsive
Maker00032881	125	155	Light responsive
Maker00032881	303	328	Phytohormone responsive
Maker00032881	20	46	Plant growth
Maker00032881	233	262	Phytohormone responsive
Maker00032881	290	319	Phytohormone responsive
Maker00032881	258	285	Phytohormone responsive
Maker00032881	657	684	Phytohormone responsive
Maker00032881	891	917	Stress responsive
Maker00032881	456	483	Light responsive
Maker00032881	457	483	Light responsive
Maker00032881	412	438	Light responsive
Maker00032881	958	984	Light responsive
Maker00032889	528	554	Stress responsive
Maker00032889	763	789	Stress responsive
Maker00032889	443	469	Light responsive
Maker00032889	323	352	Phytohormone responsive
Maker00032889	38	63	Phytohormone responsive
Maker00032889	516	546	Phytohormone responsive
Maker00032889	518	543	Phytohormone responsive
Maker00032889	646	671	Phytohormone responsive
Maker00032889	772	797	Phytohormone responsive
Maker00032889	377	407	Light responsive
Maker00033008	611	640	Phytohormone responsive
Maker00033008	613	638	Phytohormone responsive
Maker00033008	725	753.5	Plant growth
Maker00033008	845	871	Light responsive
Maker00033008	958	984	Light responsive
Maker00033008	907	933	Stress responsive
Maker00033008	926	952	Stress responsive
Maker00033008	996	1022	Phytohormone responsive
Maker00033008	799	828	Phytohormone responsive
Maker00033008	676	702	Plant growth
Maker00034258	858	884	Stress responsive
Maker00034258	600	631	Light responsive
Maker00034258	412	442	Light responsive
Maker00034258	649	674	Phytohormone responsive
Maker00034258	723	749	Light responsive
Maker00034258	924	950	Light responsive
Maker00034258	556	582	Light responsive
Maker00034258	754	780	Light responsive
Maker00034258	651	676	Phytohormone responsive
Maker00034258	649	674	Phytohormone responsive
Maker00034258	647	676	Plant growth
Maker00034258	750	779	Stress responsive
Maker00037560	760	787	Light responsive
Maker00037560	317	343	Stress responsive
Maker00037560	924	950	Stress responsive
Maker00037560	427	453	Light responsive
Maker00037560	431	458	Light responsive
Maker00037560	432	458	Light responsive
Maker00037560	73	102	Phytohormone responsive
Maker00037560	434	461	Light responsive
Maker00037560	822	848	Light responsive
Maker00039955	377	406	Stress responsive
Maker00039955	372	398	Light responsive
Maker00039955	453	479	Light responsive
Maker00039955	727	753	Light responsive
Maker00039955	302	330	Stress responsive
Maker00039955	803	832	Phytohormone responsive
Maker00039955	978	1004	Light responsive
Maker00039955	206	232	Stress responsive
Maker00040122	396	422	Stress responsive
Maker00040122	715	741	Stress responsive
Maker00040122	722	748	Stress responsive
Maker00040122	883	913	Light responsive
Maker00040122	612	638	Phytohormone responsive
Maker00040122	286	311	Phytohormone responsive
Maker00040122	11	42	Light responsive
Maker00040122	531	560	Light responsive
Maker00040122	10	37	Light responsive
Maker00040122	646	673	Light responsive
Maker00040122	365	394	Stress responsive
Maker00040122	446	475	Stress responsive
Maker00040122	669	697	Plant growth
Maker00040122	176	201	Phytohormone responsive
Maker00040122	801	826	Phytohormone responsive
Maker00040122	286	311	Phytohormone responsive
Maker00041645	425	451	Light responsive
Maker00041645	822	848	Light responsive
Maker00041645	951	980	Light responsive
Maker00041645	63	92	Phytohormone responsive
Maker00041645	315	341	Stress responsive
Maker00041645	924	950	Stress responsive
Maker00041645	974	1000	Stress responsive
Maker00041645	754	781	Light responsive
Maker00041853	164	190	Phytohormone responsive
Maker00041853	515	543	Light responsive
Maker00041853	223	252	Phytohormone responsive
Maker00041853	48	75	Light responsive
Maker00041853	732	761	Light responsive
Maker00041853	494	520	Light responsive
Maker00041853	939	965	Light responsive
Maker00041853	928	957	Stress responsive
Maker00041853	309	337	Light responsive
Maker00041853	536	561	Phytohormone responsive
Maker00041853	671	696	Phytohormone responsive
Maker00042256	241	267	Light responsive
Maker00042256	183	212	Phytohormone responsive
Maker00042256	293	319	Phytohormone responsive
Maker00042256	294	319	Phytohormone responsive
Maker00042256	600	625	Phytohormone responsive
Maker00042256	736	765	Light responsive
Maker00042256	742	771	Light responsive
Maker00042256	760	785	Phytohormone responsive
Maker00042256	304	330	Stress responsive
Maker00042256	760	785	Phytohormone responsive
Maker00042256	812	838	Light responsive
Maker00042590	232	259	Light responsive
Maker00042590	506	535	Phytohormone responsive
Maker00042590	508	533	Phytohormone responsive
Maker00042590	702	727	Phytohormone responsive
Maker00042590	926	951	Phytohormone responsive
Maker00042590	984	1010	Light responsive
Maker00042590	870	899	Stress responsive
Maker00042590	438	464	Light responsive
Maker00042590	562	588	Light responsive
Maker00042590	251	280	Light responsive
Maker00042590	960	989	Light responsive
Maker00043572	349	378	Stress responsive
Maker00043572	773	800	Plant growth
Maker00043572	599	625	Light responsive
Maker00043572	846	872	Light responsive
Maker00043572	520	547	Light responsive
Maker00043572	521	547	Light responsive
Maker00043572	28	54	Light responsive
Maker00043572	28	57	Stress responsive
Maker00043572	945	974	Stress responsive
Maker00043572	651	679	Light responsive
Maker00043616	430	459	Plant growth
Maker00043616	479	509	Light responsive
Maker00043616	250	275	Phytohormone responsive
Maker00043616	420	445	Phytohormone responsive
Maker00043616	412	438	Light responsive
Maker00043616	516	542	Light responsive
Maker00043616	605	631	Light responsive
Maker00043616	255	282	Light responsive
Maker00043616	256	282	Light responsive
Maker00043616	904	931	Light responsive
Maker00043616	905	931	Light responsive
Maker00043616	250	275	Phytohormone responsive
Maker00043616	420	445	Phytohormone responsive
Maker00043616	208	237	Light responsive
Maker00043616	191	217	Plant growth
Maker00043647	196	222	Light responsive
Maker00043647	850	876	Light responsive
Maker00043647	871	897	Light responsive
Maker00043647	953	979	Light responsive
Maker00043647	507	535	Stress responsive
Maker00043647	151	176	Phytohormone responsive
Maker00043647	648	673	Phytohormone responsive
Maker00043647	666	691	Phytohormone responsive
Maker00043647	332	358	Stress responsive
Maker00043647	151	176	Phytohormone responsive
Maker00043647	648	673	Phytohormone responsive
Maker00043647	666	691	Phytohormone responsive
Maker00043647	309	338	Plant growth
Maker00043647	300	329	Phytohormone responsive
Maker00043647	302	327	Phytohormone responsive
Maker00043647	51	79	Light responsive
Maker00043660	654	680	Light responsive
Maker00043660	782	808	Light responsive
Maker00043660	758	784	Light responsive
Maker00043660	58	83	Phytohormone responsive
Maker00043660	374	399	Phytohormone responsive
Maker00043660	60	85	Phytohormone responsive
Maker00043660	416	441	Phytohormone responsive
Maker00043660	754	783	Stress responsive
Maker00043660	85	111	Stress responsive
Maker00043660	223	252	Light responsive
Maker00043660	60	85	Phytohormone responsive
Maker00043660	416	441	Phytohormone responsive
Maker00043660	886	913	Phytohormone responsive
Maker00044418	709	736	Light responsive
Maker00044418	924	951	Phytohormone responsive
Maker00044418	176	203	Light responsive
Maker00044418	715	742	Phytohormone responsive
Maker00044418	899	926	Phytohormone responsive
Maker00044418	830	856	Stress responsive
Maker00044418	82	108	Light responsive
Maker00044418	125	151	Light responsive
Maker00044418	344	370	Light responsive
Maker00044418	660	686	Light responsive
Maker00047127	614	644	Light responsive
Maker00047127	122	147	Phytohormone responsive
Maker00047127	631	656	Phytohormone responsive
Maker00047127	99	125	Light responsive
Maker00047127	825	851	Light responsive
Maker00047127	61	87	Light responsive
Maker00047127	949	976	Phytohormone responsive
Maker00047127	92	118	Stress responsive
Maker00047127	128	154	Stress responsive
Maker00047127	958	984	Stress responsive
Maker00047127	494	520	Stress responsive
Maker00049331	455	482	Light responsive
Maker00049331	406	433	Phytohormone responsive
Maker00049331	51	76	Phytohormone responsive
Maker00049331	525	550	Phytohormone responsive
Maker00049331	674	699	Phytohormone responsive
Maker00049331	51	76	Phytohormone responsive
Maker00049331	525	550	Phytohormone responsive
Maker00049331	674	699	Phytohormone responsive
Maker00049331	505	531	Phytohormone responsive
Maker00049331	233	259	Light responsive
Maker00049331	490	516	Light responsive
Maker00049331	696	722	Light responsive
Maker00049342	215	244	Stress responsive
Maker00049342	100	126	Light responsive
Maker00049342	206	232	Light responsive
Maker00049342	469	495	Light responsive
Maker00049342	485	511	Light responsive
Maker00049342	592	618	Light responsive
Maker00049342	670	699	Stress responsive
Maker00049342	671	699	Stress responsive
Maker00049342	280	308	Light responsive
Maker00049342	112	138	Light responsive
Maker00049342	215	241	Light responsive
Maker00049342	255	282	Light responsive
Maker00049342	301	330	Plant growth
Maker00049342	616	642	Plant growth
Maker00049342	650	676	Plant growth
Maker00049342	222	248	Phytohormone responsive
Maker00049451	103	132	Stress responsive
Maker00049451	104	132	Stress responsive
Maker00049451	195	221	Light responsive
Maker00049451	321	347	Light responsive
Maker00049451	672	698	Stress responsive
Maker00049451	904	933	Plant growth
Maker00049451	580	605	Phytohormone responsive
Maker00049451	333	361	Light responsive
Maker00050665	646	672	Light responsive
Maker00050665	379	405	Stress responsive
Maker00050665	1002	1028	Stress responsive
Maker00050665	470	496	Light responsive
Maker00050665	509	535	Light responsive
Maker00050665	126	154	Stress responsive
Maker00050665	411	439	Light responsive
Maker00050665	259	288	Stress responsive
Maker00050665	463	490	Light responsive
Maker00050665	577	604	Phytohormone responsive
Maker00052046	645	672	Phytohormone responsive
Maker00052046	263	289	Phytohormone responsive
Maker00052046	328	357	Light responsive
Maker00052046	79	105	Stress responsive
Maker00052046	810	836	Stress responsive
Maker00052046	289	316	Phytohormone responsive
Maker00052046	87	115	Light responsive
Maker00052046	414	440	Phytohormone responsive
Maker00052046	415	440	Phytohormone responsive
Maker00052046	566	591	Phytohormone responsive
Maker00052046	632	661	Phytohormone responsive
Maker00052046	281	307	Light responsive
Maker00052046	253	279	Light responsive
Maker00052728	508	538	Light responsive
Maker00052728	347	372	Phytohormone responsive
Maker00052728	373	398	Phytohormone responsive
Maker00052728	510	536	Light responsive
Maker00052728	699	725	Light responsive
Maker00052728	216	242	Light responsive
Maker00052728	220	246	Light responsive
Maker00052728	645	671	Light responsive
Maker00052728	824	850	Light responsive
Maker00052728	952	978	Light responsive
Maker00052728	993	1019	Light responsive
Maker00052728	862	891	Light responsive
Maker00052728	116	143	Light responsive
Maker00052728	854	880	Stress responsive
Maker00055186	537	566	Light responsive
Maker00055186	10	37	Light responsive
Maker00055186	646	673	Light responsive
Maker00055186	267	292	Phytohormone responsive
Maker00055186	176	201	Phytohormone responsive
Maker00055186	801	826	Phytohormone responsive
Maker00055186	432	461	Stress responsive
Maker00055186	669	697	Plant growth
Maker00055186	883	913	Light responsive
Maker00055186	267	292	Phytohormone responsive
Maker00055186	618	644	Phytohormone responsive
Maker00055186	382	408	Stress responsive
Maker00055186	715	741	Stress responsive
Maker00055186	722	748	Stress responsive
Maker00055186	197	230	Light responsive
Maker00055186	11	41	Light responsive
Maker00055315	171	197	Light responsive
Maker00055315	289	318	Light responsive
Maker00055315	444	470	Light responsive
Maker00055315	347	376	Stress responsive
Maker00055315	382	408	Stress responsive
Maker00055315	609	635	Stress responsive
Maker00055315	818	844	Stress responsive
Maker00055315	236	262	Stress responsive
Maker00055315	296	322	Plant growth
Maker00055315	712	739	Phytohormone responsive
Maker00055315	859	886	Phytohormone responsive
Maker00056555	281	307	Light responsive
Maker00056555	857	885	Light responsive
Maker00056555	244	272	Stress responsive
Maker00056555	276	305	Stress responsive
Maker00056555	686	712	Light responsive
Maker00056555	700	727	Light responsive
Maker00056555	656	682	Light responsive
Maker00056555	660	686	Light responsive
Maker00056555	223	249	Phytohormone responsive
Maker00056555	224	249	Phytohormone responsive
Maker00056555	934	961	Phytohormone responsive
Maker00056555	568	596	Light responsive
Maker00057272	105	134	Light responsive
Maker00057272	73	98	Phytohormone responsive
Maker00057272	503	528	Phytohormone responsive
Maker00057272	965	990	Phytohormone responsive
Maker00057272	36	62	Light responsive
Maker00057272	473	499	Light responsive
Maker00057272	492	521	Phytohormone responsive
Maker00057272	239	265	Light responsive
Maker00057272	253	280	Phytohormone responsive
Maker00057272	353	380	Phytohormone responsive
Maker00057272	951	977	Phytohormone responsive
Maker00057272	130	156	Stress responsive
Maker00057272	337	364	Phytohormone responsive
Maker00058364	935	961	Stress responsive
Maker00058364	256	282	Stress responsive
Maker00058364	338	366	Light responsive
Maker00058364	381	407	Phytohormone responsive
Maker00058364	731	756	Phytohormone responsive
Maker00058364	123	151	Light responsive
Maker00058364	849	876	Light responsive
Maker00058364	333	359	Light responsive
Maker00058364	360	386	Light responsive
Maker00058364	556	582	Light responsive
Maker00058364	162	191.5	Light responsive
Maker00058364	728	753	Phytohormone responsive
Maker00058364	731	756	Phytohormone responsive
Maker00058379	240	268	Plant growth
Maker00058379	696	721	Phytohormone responsive
Maker00058379	915	944	Plant growth
Maker00058379	63	91.5	Plant growth
Maker00058379	435	460	Phytohormone responsive
Maker00058379	950	976	Stress responsive
Maker00058379	435	460	Phytohormone responsive
Maker00058379	709	738	Phytohormone responsive
Maker00059234	183	208	Phytohormone responsive
Maker00059234	239	264	Phytohormone responsive
Maker00059234	663	692	Stress responsive
Maker00059234	146	179	Light responsive
Maker00059234	591	617	Light responsive
Maker00059234	43	69	Light responsive
Maker00059234	572	601	Light responsive
Maker00059234	494	520	Stress responsive
Maker00059234	571	597	Stress responsive
Maker00059234	720	746	Stress responsive
Maker00059272	351	379	Light responsive
Maker00059272	204	233	Plant growth
Maker00059685	792	821	Phytohormone responsive
Maker00059685	718	746.5	Plant growth
Maker00059685	837	863	Light responsive
Maker00059685	958	984	Light responsive
Maker00059685	608	637	Phytohormone responsive
Maker00059685	610	635	Phytohormone responsive
Maker00059685	695	721	Stress responsive
Maker00059685	907	933	Stress responsive
Maker00059685	673	699	Plant growth
Maker00059685	996	1022	Phytohormone responsive
Maker00060251	148	175	Light responsive
Maker00060251	291	316	Phytohormone responsive
Maker00060251	117	143	Plant growth
Maker00060251	291	316	Phytohormone responsive
Maker00060251	759	784	Phytohormone responsive
Maker00060251	767	792	Phytohormone responsive
Maker00060251	317	343	Light responsive
Maker00060251	388	414	Light responsive
Maker00060251	548	574	Light responsive
Maker00060251	646	672	Light responsive
Maker00060251	849	875	Light responsive
Maker00060251	536	564	Light responsive
Maker00061978	88	114	Light responsive
Maker00061978	519	544	Phytohormone responsive
Maker00061978	572	597	Phytohormone responsive
Maker00061978	779	804	Phytohormone responsive
Maker00061978	941	969	Light responsive
Maker00061978	93	119	Light responsive
Maker00061978	314	340	Stress responsive
Maker00061978	768	799	Light responsive
Maker00061978	816	845	Plant growth
Maker00061978	519	544	Phytohormone responsive
Maker00061978	572	597	Phytohormone responsive
Maker00061978	779	804	Phytohormone responsive
Maker00062204	419	444	Phytohormone responsive
Maker00062204	1002	1027	Phytohormone responsive
Maker00062204	112	138	Light responsive
Maker00062204	732	758	Light responsive
Maker00062204	10	36	Stress responsive
Maker00062204	611	640	Light responsive
Maker00062204	798	824	Plant growth
Maker00063010	613	642	Stress responsive
Maker00063010	598	628	Light responsive
Maker00063010	442	468	Light responsive
Maker00063010	221	247	Stress responsive
Maker00063010	925	951	Stress responsive
Maker00063010	226	252	Phytohormone responsive
Maker00063010	23	51	Light responsive
Maker00063010	379	407	Light responsive
Maker00063010	179	205	Light responsive
Maker00063010	477	503	Light responsive
Maker00063010	732	758	Light responsive
Maker00063941	817	846	Phytohormone responsive
Maker00063941	65	92	Light responsive
Maker00063941	564	590	Phytohormone responsive
Maker00063941	565	590	Phytohormone responsive
Maker00063941	158	188	Light responsive
Maker00063941	916	946	Light responsive
Maker00063941	60	86	Stress responsive
Maker00063941	39	65	Stress responsive
Maker00063941	534	567	Light responsive
Maker00063941	79	108	Plant growth
Maker00063941	579	606	Phytohormone responsive
Maker00064417	249	274	Phytohormone responsive
Maker00064417	767	792	Phytohormone responsive
Maker00064417	13	38	Phytohormone responsive
Maker00064417	492	518	Phytohormone responsive
Maker00064417	493	518	Phytohormone responsive
Maker00064417	249	274	Phytohormone responsive
Maker00064417	767	792	Phytohormone responsive
Maker00064417	773	799	Phytohormone responsive
Maker00064417	992	1018	Stress responsive
Maker00064417	586	612	Light responsive
Maker00064504	679	704	Phytohormone responsive
Maker00064504	756	783	Phytohormone responsive
Maker00064504	180	206	Light responsive
Maker00064504	194	220	Light responsive
Maker00064504	42	68	Light responsive
Maker00064504	829	858	Stress responsive
Maker00064504	266	295	Light responsive
Maker00064504	166	192	Plant growth
Maker00064504	220	246	Plant growth
Maker00064504	539	565	Stress responsive
Maker00064534	131	157	Light responsive
Maker00064534	770	797	Phytohormone responsive
Maker00064534	295	322	Light responsive
Maker00064534	673	700	Light responsive
Maker00064534	392	418	Stress responsive
Maker00064534	694	720	Light responsive
Maker00064534	806	835	Stress responsive
Maker00064788	509	538	Stress responsive
Maker00064788	577	602	Phytohormone responsive
Maker00064788	382	408	Light responsive
Maker00064788	457	483	Light responsive
Maker00064788	548	574	Light responsive
Maker00064788	157	186	Light responsive
Maker00064788	348	374	Phytohormone responsive
Maker00064788	388	414	Phytohormone responsive
Maker00064788	577	602	Phytohormone responsive
Maker00064788	183	210	Plant growth
Maker00065771	989	1015	Light responsive
Maker00065771	892	920	Stress responsive
Maker00065771	550	579	Light responsive
Maker00065771	644	670	Light responsive
Maker00065771	899	925	Light responsive
Maker00065771	152	181	Phytohormone responsive
Maker00065771	154	180	Phytohormone responsive
Maker00065771	155	180	Phytohormone responsive
Maker00065771	169	194	Phytohormone responsive
Maker00065771	686	714	Phytohormone responsive
Maker00065771	688	713	Phytohormone responsive
Maker00065771	970	995	Phytohormone responsive
Maker00065771	321	346	Phytohormone responsive
Maker00065771	644	673	Stress responsive
Maker00065771	686	715	Light responsive
Maker00065771	145	172	Phytohormone responsive
Maker00065771	321	346	Phytohormone responsive
Maker00066517	347	376	Stress responsive
Maker00066517	88	114	Light responsive
Maker00066517	178	204	Light responsive
Maker00066517	444	470	Light responsive
Maker00066517	296	325	Light responsive
Maker00066517	711	738	Phytohormone responsive
Maker00066517	858	885	Phytohormone responsive
Maker00066517	243	269	Stress responsive
Maker00066517	382	408	Stress responsive
Maker00066517	608	634	Stress responsive
Maker00066517	817	843	Stress responsive
Maker00066517	303	329	Plant growth
Maker00066632	511	540	Stress responsive
Maker00066632	467	493	Light responsive
Maker00066632	787	813	Light responsive
Maker00066632	966	992	Light responsive
Maker00066632	894	920	Stress responsive
Maker00066632	13	42	Phytohormone responsive
Maker00066632	161	187	Stress responsive
Maker00066632	239	265	Stress responsive
Maker00066632	929	955	Stress responsive
Maker00067925	378	407	Stress responsive
Maker00067925	978	1004	Light responsive
Maker00067925	805	834	Phytohormone responsive
Maker00067925	373	399	Light responsive
Maker00067925	454	480	Light responsive
Maker00067925	729	755	Light responsive
Maker00069320	250	276	Phytohormone responsive
Maker00069320	66	92	Stress responsive
Maker00069320	801	827	Stress responsive
Maker00069320	276	303	Phytohormone responsive
Maker00069320	636	663	Phytohormone responsive
Maker00069320	268	294	Light responsive
Maker00069320	240	266	Light responsive
Maker00069320	401	427	Phytohormone responsive
Maker00069320	402	427	Phytohormone responsive
Maker00069320	553	578	Phytohormone responsive
Maker00071853	874	901	Phytohormone responsive
Maker00071853	925	950	Phytohormone responsive
Maker00071853	49	76	Light responsive
Maker00071853	70	96	Plant growth
Maker00071853	834	862	Light responsive
Maker00071853	310	336	Stress responsive
Maker00071853	654	680	Light responsive
Maker00073830	471	496	Phytohormone responsive
Maker00073830	113	139	Light responsive
Maker00073830	868	896	Light responsive
Maker00073830	499	528	Phytohormone responsive
Maker00074173	189	216	Phytohormone responsive
Maker00074173	9	35	Stress responsive
Maker00074173	523	552	Light responsive
Maker00074173	160	186	Light responsive
Maker00074173	43	71	Light responsive
Maker00074173	238	264	Phytohormone responsive
Maker00074173	239	264	Phytohormone responsive
Maker00074173	324	353	Phytohormone responsive
Maker00074173	326	352	Phytohormone responsive
Maker00074173	327	352	Phytohormone responsive
Maker00074173	720	748	Light responsive
Maker00074173	250	277	Light responsive
Maker00074173	251	277	Light responsive
Maker00074173	616	642	Light responsive
Maker00074173	673	702	Stress responsive
Maker00074173	855	883.5	Plant growth
Maker00074173	897	925	Light responsive
Maker00074230	241	267	Light responsive
Maker00074230	723	749	Stress responsive
Maker00074230	357	383	Plant growth
Maker00074230	813	839	Plant growth
Maker00075016	490	516	Stress responsive
Maker00075016	162	188	Stress responsive
Maker00075016	621	647	Stress responsive
Maker00075016	626	652	Stress responsive
Maker00075016	666	692	Stress responsive
Maker00075016	814	840	Stress responsive
Maker00075016	938	964	Stress responsive
Maker00075016	97	123	Plant growth
Maker00075016	123	152	Light responsive
Maker00075016	895	921	Phytohormone responsive
Maker00075016	372	399	Phytohormone responsive
Maker00075016	819	847	Light responsive
Maker00075016	367	393	Light responsive
Maker00075016	435	461	Light responsive
Maker00075016	510	536	Light responsive
Maker00075016	325	351	Phytohormone responsive
Maker00075016	326	351	Phytohormone responsive
Maker00075382	538	564	Light responsive
Maker00075382	933	959	Light responsive
Maker00075382	540	567	Light responsive
Maker00075734	161	189	Light responsive
Maker00075734	370	400	Light responsive
Maker00075734	146	172	Stress responsive
Maker00075734	847	873	Stress responsive
Maker00075734	876	902	Stress responsive
Maker00075734	370	399	Light responsive
Maker00075734	299	327	Stress responsive
Maker00075734	742	768	Light responsive
Maker00076082	587	612	Phytohormone responsive
Maker00076082	445	471	Phytohormone responsive
Maker00076082	209	238	Light responsive
Maker00076082	795	821	Light responsive
Maker00076082	600	628	Stress responsive
Maker00076082	673	699	Light responsive
Maker00076082	927	953	Light responsive
Maker00076183	204	230	Light responsive
Maker00076183	120	145	Phytohormone responsive
Maker00076183	486	511	Phytohormone responsive
Maker00076183	122	147	Phytohormone responsive
Maker00076183	705	730	Phytohormone responsive
Maker00076183	648	674	Stress responsive
Maker00076183	932	958	Stress responsive
Maker00076183	122	147	Phytohormone responsive
Maker00076183	705	730	Phytohormone responsive
Maker00076183	308	334	Phytohormone responsive
Maker00076183	489	516	Phytohormone responsive
Maker00076183	636	665	Plant growth
Maker00076183	180	213	Light responsive
Maker00076244	588	615	Light responsive
Maker00076244	767	796	Light responsive
Maker00076244	553	579	Light responsive
Maker00076244	884	914	Light responsive
Maker00076244	773	800	Phytohormone responsive
Maker00076244	25	51	Stress responsive
Maker00076244	478	504	Stress responsive
Maker00076244	125	154	Phytohormone responsive
Maker00076244	758	787	Phytohormone responsive
Maker00077137	484	513	Phytohormone responsive
Maker00077137	341	367	Stress responsive
Maker00077137	627	653	Stress responsive
Maker00077137	948	974	Stress responsive
Maker00077137	869	895	Light responsive
Maker00077137	221	250	Stress responsive
Maker00077137	791	819	Light responsive
Maker00077137	183	211	Light responsive
Maker00077137	856	883	Light responsive
Maker00077137	131	159	Light responsive
Maker00077519	438	467	Plant growth
Maker00077519	29	54	Phytohormone responsive
Maker00077519	436	461	Phytohormone responsive
Maker00077519	441	466	Phytohormone responsive
Maker00077519	439	464	Phytohormone responsive
Maker00077519	29	54	Phytohormone responsive
Maker00077519	436	461	Phytohormone responsive
Maker00077519	441	466	Phytohormone responsive
Maker00077519	176	202	Stress responsive
Maker00077519	337	363	Light responsive
Maker00077519	607	633	Light responsive
Maker00077519	770	796	Light responsive
Maker00077519	970	996	Light responsive
Maker00077519	993	1019	Light responsive
Maker00077618	223	250	Plant growth
Maker00077618	678	704	Phytohormone responsive
Maker00077618	480	505	Phytohormone responsive
Maker00077618	316	343	Phytohormone responsive
Maker00077618	480	505	Phytohormone responsive
Maker00077618	482	507	Phytohormone responsive
Maker00077618	602	627	Phytohormone responsive
Maker00077618	283	312	Stress responsive
Maker00077618	556	582	Light responsive
Maker00077618	995	1021	Light responsive
Maker00077618	1002	1028	Light responsive
Maker00077684	406	434	Light responsive
Maker00077684	212	240	Phytohormone responsive
Maker00077684	214	239	Phytohormone responsive
Maker00077684	579	606	Light responsive
Maker00077684	444	473	Plant growth
Maker00077684	727	756	Plant growth
Maker00077684	224	249	Phytohormone responsive
Maker00077684	251	277	Light responsive
Maker00077684	256	282	Light responsive
Maker00077684	27	53	Light responsive
Maker00077684	545	572	Light responsive
Maker00077684	479	505	Stress responsive
Maker00077684	932	960	Light responsive
Maker00077684	217	246.5	Plant growth
Maker00077684	209	235	Phytohormone responsive
Maker00077684	224	249	Phytohormone responsive
Maker00077797	308	334	Stress responsive
Maker00077797	660	686	Stress responsive
Maker00077797	721	747	Stress responsive
Maker00077797	777	804	Phytohormone responsive
Maker00077797	160	185	Phytohormone responsive
Maker00077797	34	60	Phytohormone responsive
Maker00077797	61	87	Phytohormone responsive
Maker00077797	70	96	Phytohormone responsive
Maker00077797	94	120	Phytohormone responsive
Maker00077797	141	167	Phytohormone responsive
Maker00077797	277	303	Phytohormone responsive
Maker00077797	295	321	Phytohormone responsive
Maker00077797	351	377	Phytohormone responsive
Maker00077797	394	420	Phytohormone responsive
Maker00077797	751	777	Phytohormone responsive
Maker00077797	993	1022	Stress responsive
Maker00077797	823	851	Light responsive
Maker00077797	304	330	Phytohormone responsive
Maker00077797	305	330	Phytohormone responsive
Maker00077797	160	185	Phytohormone responsive
Maker00077797	954	980	Light responsive
Maker00077797	227	256	Light responsive
Maker00077797	826	854	Stress responsive
Maker00077797	601	630	Light responsive
Maker00079198	41	67	Plant growth
Maker00079198	851	877	Plant growth
Maker00079198	533	558	Phytohormone responsive
Maker00079198	60	89.5	Plant growth
Maker00079198	943	972	Stress responsive
Maker00079198	968	996	Light responsive
Maker00079198	533	558	Phytohormone responsive
Maker00079198	430	455	Phytohormone responsive
Maker00079198	672	701	Phytohormone responsive
Maker00079198	943	969	Light responsive
Maker00079198	845	871	Light responsive
Maker00079675	726	752	Stress responsive
Maker00079675	832	858	Stress responsive
Maker00079675	979	1005	Stress responsive
Maker00079675	385	411	Phytohormone responsive
Maker00079675	27	52	Phytohormone responsive
Maker00079675	51	76	Phytohormone responsive
Maker00079675	643	668	Phytohormone responsive
Maker00079675	769	795	Stress responsive
Maker00079675	487	516	Stress responsive
Maker00079675	29	54	Phytohormone responsive
Maker00079675	53	78	Phytohormone responsive
Maker00079675	274	303	Phytohormone responsive
Maker00079675	452	477	Phytohormone responsive
Maker00079675	695	720	Phytohormone responsive
Maker00079675	27	52	Phytohormone responsive
Maker00079675	51	76	Phytohormone responsive
Maker00079675	643	668	Phytohormone responsive
Maker00079675	113	142	Plant growth
Maker00079675	624	650	Light responsive
Maker00079675	907	936	Stress responsive
Maker00080208	767	798	Light responsive
Maker00080208	519	544	Phytohormone responsive
Maker00080208	572	597	Phytohormone responsive
Maker00080208	778	803	Phytohormone responsive
Maker00080208	815	844	Plant growth
Maker00080208	519	544	Phytohormone responsive
Maker00080208	572	597	Phytohormone responsive
Maker00080208	778	803	Phytohormone responsive
Maker00080208	91	117	Light responsive
Maker00080208	314	340	Stress responsive
Maker00080208	96	122	Light responsive
Maker00080208	940	968	Light responsive
Maker00083096	82	108	Light responsive
Maker00083096	188	214	Light responsive
Maker00083096	559	585	Light responsive
Maker00083096	622	649	Light responsive
Maker00083096	474	500	Stress responsive
Maker00083096	648	674	Stress responsive
Maker00083096	956	982	Stress responsive
Maker00083096	495	521	Light responsive
Maker00083096	373	402	Light responsive
Maker00083096	966	993	Light responsive
Maker00083096	243	270	Phytohormone responsive
Maker00083753	817	844	Phytohormone responsive
Maker00083753	577	606	Light responsive
Maker00083753	500	530	Phytohormone responsive
Maker00083753	501	530	Phytohormone responsive
Maker00083753	504	529	Phytohormone responsive
Maker00083753	579	604	Phytohormone responsive
Maker00083753	82	111	Phytohormone responsive
Maker00083753	438	464	Light responsive
Maker00083753	40	66	Light responsive
Maker00086957	829	855	Phytohormone responsive
Maker00086957	830	855	Phytohormone responsive
Maker00086957	588	616	Light responsive
Maker00086957	190	219	Stress responsive
Maker00086957	529	555	Light responsive
Maker00086957	691	717	Light responsive
Maker00086957	420	446	Light responsive
Maker00086957	750	776	Light responsive
Maker00087187	836	865	Stress responsive
Maker00087187	620	645	Phytohormone responsive
Maker00087187	219	244	Phytohormone responsive
Maker00087187	374	400	Light responsive
Maker00087187	476	502	Light responsive
Maker00087187	68	94	Light responsive
Maker00087187	964	991	Phytohormone responsive
Maker00087187	219	244	Phytohormone responsive
Maker00087187	783	812.5	Plant growth
Maker00087487	740	768	Light responsive
Maker00087487	831	859	Light responsive
Maker00087487	846	871	Phytohormone responsive
Maker00087487	663	692.5	Light responsive
Maker00087487	536	562	Light responsive
Maker00087487	585	611	Light responsive
Maker00087487	284	313	Plant growth
Maker00087487	846	871	Phytohormone responsive
Maker00087487	695	721	Stress responsive
Maker00087487	650	676	Stress responsive
Maker00087523	810	836	Phytohormone responsive
Maker00087523	811	836	Phytohormone responsive
Maker00087523	320	348	Light responsive
Maker00087523	499	525	Light responsive
Maker00087523	678	704	Light responsive
Maker00087523	724	751	Phytohormone responsive
Maker00087523	324	350	Light responsive
Maker00087523	396	422	Light responsive
Maker00087523	731	757	Light responsive
Maker00087523	537	563	Stress responsive
Maker00089493	601	632	Light responsive
Maker00089493	859	885	Stress responsive
Maker00089493	408	438	Light responsive
Maker00089493	650	675	Phytohormone responsive
Maker00089493	751	780	Stress responsive
Maker00089493	652	677	Phytohormone responsive
Maker00089493	650	675	Phytohormone responsive
Maker00089493	648	677	Plant growth
Maker00089493	557	583	Light responsive
Maker00089493	755	781	Light responsive
Maker00089493	724	750	Light responsive
Maker00089493	925	951	Light responsive
Maker00090582	280	305	Phytohormone responsive
Maker00090582	314	339	Phytohormone responsive
Maker00090582	188	214	Phytohormone responsive
Maker00090582	189	214	Phytohormone responsive
Maker00090582	354	379	Phytohormone responsive
Maker00090582	395	423	Light responsive
Maker00090582	162	188	Light responsive
Maker00090582	254	280	Light responsive
Maker00090582	426	452	Light responsive
Maker00090582	351	380	Light responsive
Maker00090582	303	330	Light responsive
Maker00090582	710	736	Plant growth
Maker00090582	280	305	Phytohormone responsive
Maker00090582	314	339	Phytohormone responsive
Maker00090582	56	83	Phytohormone responsive
Maker00090582	964	995	Light responsive
Maker00090582	180	206	Stress responsive
Maker00091361	559	586	Phytohormone responsive
Maker00091361	481	509	Light responsive
Maker00091361	994	1021	Light responsive
Maker00091361	604	630	Light responsive
Maker00091361	296	325	Light responsive
Maker00091361	426	453	Light responsive
Maker00091361	888	914	Stress responsive
Maker00091416	72	100	Plant growth
Maker00091416	460	485	Phytohormone responsive
Maker00091416	641	667	Stress responsive
Maker00091416	675	703	Light responsive
Maker00091416	22	49	Light responsive
Maker00091416	23	49	Light responsive
Maker00091416	213	239	Light responsive
Maker00091416	237	263	Light responsive
Maker00091416	615	641	Light responsive
Maker00091416	684	710	Light responsive
Maker00091496	959	985	Stress responsive
Maker00091496	655	681	Stress responsive
Maker00091496	407	433	Stress responsive
Maker00091496	505	530	Phytohormone responsive
Maker00091496	475	503	Light responsive
Maker00091496	679	707	Light responsive
Maker00091496	150	176	Light responsive
Maker00091496	946	973	Light responsive
Maker00091496	986	1013	Light responsive
Maker00091496	973	1000	Phytohormone responsive
Maker00091496	505	530	Phytohormone responsive
Maker00091900	232	258	Phytohormone responsive
Maker00091900	233	258	Phytohormone responsive
Maker00091900	857	885	Light responsive
Maker00091900	663	689	Light responsive
Maker00091900	667	693	Light responsive
Maker00091900	707	734	Light responsive
Maker00091900	122	151	Stress responsive
Maker00091900	253	281	Stress responsive
Maker00091900	360	389	Stress responsive
Maker00091900	575	603	Light responsive
Maker00091900	608	635	Light responsive
Maker00091900	934	961	Phytohormone responsive
Maker00091900	141	167	Plant growth
Maker00095444	818	845	Light responsive
Maker00095444	876	903	Light responsive
Maker00095444	435	463	Light responsive
Maker00095444	283	309	Light responsive
Maker00095444	343	369	Light responsive
Maker00095444	9	35	Stress responsive
Maker00095444	17	43	Stress responsive
Maker00095444	26	52	Stress responsive
Maker00095444	228	257	Stress responsive
Maker00096205	579	605	Stress responsive
Maker00096205	746	772	Stress responsive
Maker00096205	782	808	Stress responsive
Maker00096205	17	47	Light responsive
Maker00096205	828	858	Light responsive
Maker00096205	692	718	Phytohormone responsive
Maker00096205	596	622	Light responsive
Maker00096205	598	624	Light responsive
Maker00096205	112	138	Light responsive
Maker09720	717	746	Light responsive
Maker09720	472	498	Light responsive
Maker09720	928	954	Light responsive
Maker09720	917	946	Stress responsive
Maker09720	245	274	Phytohormone responsive
Maker09720	187	213	Phytohormone responsive
Maker09720	287	315	Light responsive
