# Supplementary material for: Genome-wide analysis of R2R3-MYB transcription factors in Boehmeria nivea (L.) gaudich revealed potential cadmium tolerance and anthocyanin biosynthesis genes
Source: Front Genet. 2023 Feb 21;14:1080909. doi: 10.3389/fgene.2023.1080909 (PMC9989182; doi:10.3389/fgene.2023.1080909)
Supplement: Supplementary file 11 [file Table8.XLSX]

## Sheet: a
Table S8: The primers used in this study.
Primer name	Primer sequence	Primer name	Primer sequence
BnGMYB10-F	ACTGCGATGGCGAGGTCAA	BnGMYB10-R	AACGCTGAGGAAGTCGGAGAA
BnGMYB11-F	AGCTGGACGATTGCCTGGT	BnGMYB11-R	CGCCTTGCTTGTCGGATCTC
BnGMYB12-F	TTCGGAGCCAGAACCTAGCA	BnGMYB12-R	TTGGTGAACCTCGTAGCCTTG
BnGMYB78-F	GGCTGCTGGAGAATTGGATGAA	BnGMYB78-R	ATGATGATGAGGAGGCGTGGA
BnGMYB28-F	CAAGCAACAACTTATACGCCTCT	BnGMYB28-R	GAAGCCGAGTCAGTCCCATAA
BnGMYB41-F	GGTTCAAGTCCAAGTCCAGGTG	BnGMYB41-R	GCTTCTGCTTCTCGTGATGATGA
BnGMYB9-F	GGTGTTGGTGGTGGTGCTAAT	BnGMYB9-R	CCTGGACTTGTTGGTCTTGGAA
BnGMYB104-F	CTTGCCGAGACCATGCTTGA	BnGMYB104-R	CGCTTCATCATCATCCATCTTCC
BnGMYB90-F	GCAGTTCTTCAGTGCGGAGTT	BnGMYB90-R	AACGGCTTCAGTGTGGAGATAC
BnGMYB45-F	CGACGCATACGACAGATACGA	BnGMYB45-R	GGCAGACACAGAGTGAGGTTC
BnGMYB89-F	ATACGGAGCGAGGTGAGGAG	BnGMYB89-R	ATGAACCCATCGAACCCATTAGG
BnGMYB97-F	GTGCTCTTCTTCGACCTCGT	BnGMYB97-R	TGCTCCACGGACCCTTGAT
